# Supplementary material for: Synthesis and capacitive performance of two-dimensional sandwich-like graphene/nitrogen-doped carbon nanoparticle composites with tunable textural parameters and nitrogen content
Source: Royal Society of Chemistry journal article supplement (doi:10.1039/c3nj00764b), 2013-01-01
Supplement: c3nj00764b.pdf [file c3nj00764b.pdf]

## Supporting information

### Synthesis and capacitive performance of two-dimensional sandwichlike graphene/nitrogen-doped carbon nanoparticles composites with tunable textural parameters and nitrogen content

Min Zhou, Fan Pu, Hao Chen, Zhao Wang, Haiyong Zhang, Shiyong Guan\*

*School of Materials Science and Engineering, East China University of Science and*

*Technology, Mei Long Road 130, Shanghai 200237, P.R.China*

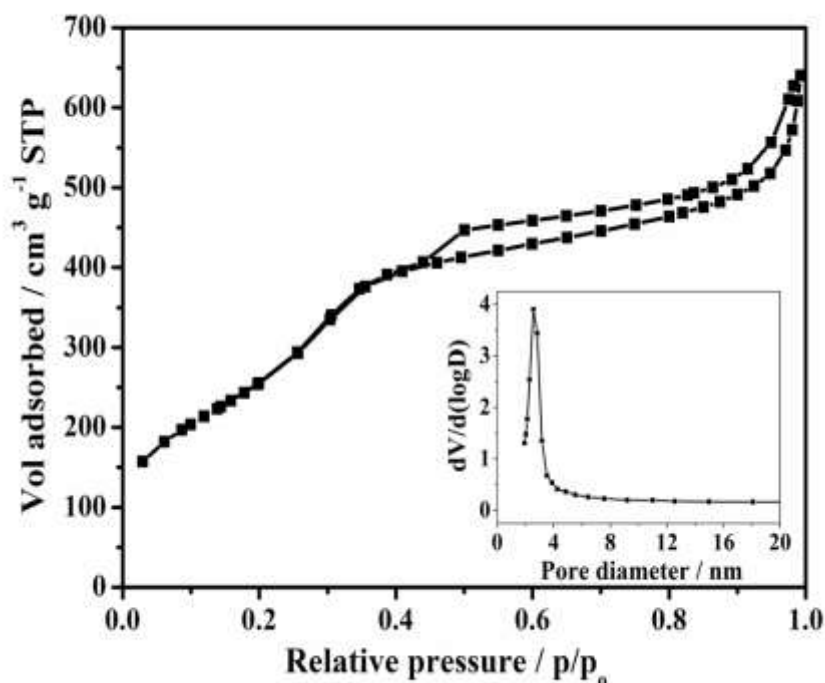

Fig. S1. Nitrogen adsorption/desorption isotherm of the G/p-SiO<sub>2</sub> composites (inset: pore size distribution), demonstrating the mesoporous structure with BET surface area of 932 m<sup>2</sup> g<sup>-1</sup> and pore size of 2.5 nm, which is similar to that reported by Yang *et al.*.

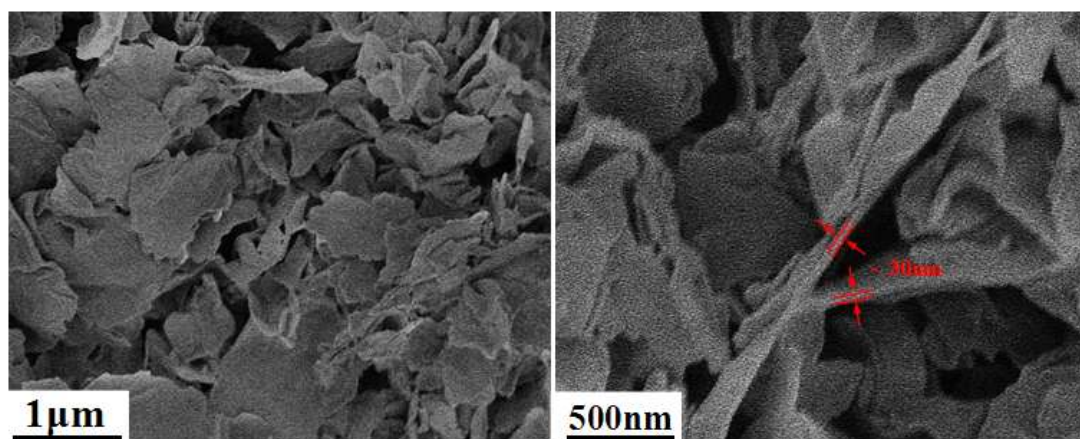

Fig. S2. FE-SEM images of the G/p-SiO<sub>2</sub> composites, showing large amounts of two-dimensional sheets with morphology similar to that of graphene, sizes ranging from several hundred nanometers to several micrometers, and thickness of about 30 nm. These two-dimensional sheets appear a loosely packed structure.

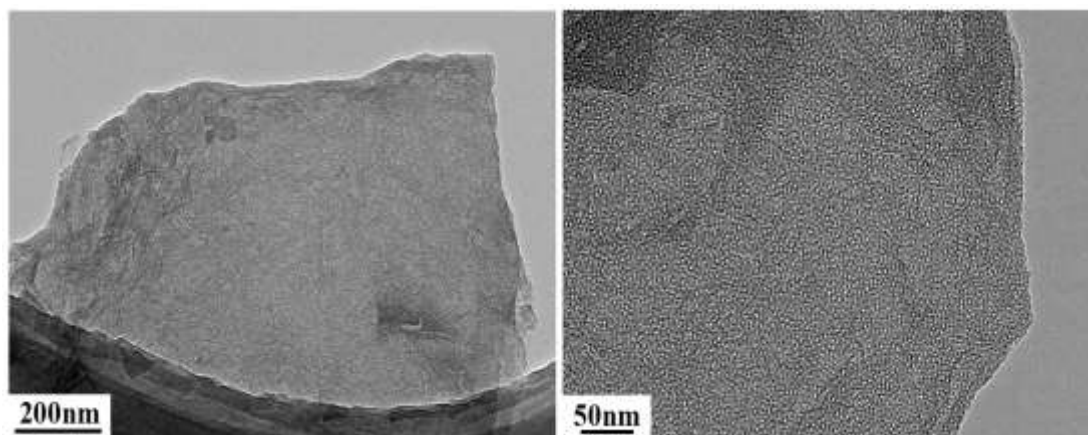

Fig. S3. TEM images of the G/p-SiO<sub>2</sub> composites, showing numerous mesopores with the size of about 2.5 nm.
